# Supplementary material for: Mononuclear metavanadate catalyses gas phase oxidation of methanol to formaldehyde employing dioxygen as the terminal oxidant
Source: Royal Society of Chemistry journal article supplement (doi:10.1039/b612384h), 2006-01-01
Supplement: b612384h.pdf [file b612384h.pdf]

# Mononuclear Metavanadate Catalyses Gas Phase Oxidation of Methanol to Formaldehyde Employing Dioxygen as the Terminal Oxidant

Tom Waters,<sup>a,b</sup> George N. Khairallah,<sup>a,b</sup> Samantha A. S. Y. Wimala,<sup>a,b</sup> Yien C. Ang,<sup>a,b</sup> Richard A. J. O'Hair,<sup>\*a,b</sup> and Anthony G. Wedd<sup>a,b</sup>

## Supporting Information

**S1:** Complete citation for reference 18a: Gaussian 03, Revision B.04, M. J. Frisch, G. W. Trucks, H. B. Schlegel, G. E. Scuseria, M. A. Robb, J. R. Cheeseman, J. A. Montgomery, Jr., T. Vreven, K. N. Kudin, J. C. Burant, J. M. Millam, S. S. Iyengar, J. Tomasi, V. Barone, B. Mennucci, M. Cossi, G. Scalmani, N. Rega, G. A. Petersson, H. Nakatsuji, M. Hada, M. Ehara, K. Toyota, R. Fukuda, J. Hasegawa, M. Ishida, T. Nakajima, Y. Honda, O. Kitao, H. Nakai, M. Klene, X. Li, J. E. Knox, H. P. Hratchian, J. B. Cross, V. Bakken, C. Adamo, J. Jaramillo, R. Gomperts, R. E. Stratmann, O. Yazyev, A. J. Austin, R. Cammi, C. Pomelli, J. W. Ochterski, P. Y. Ayala, K. Morokuma, G. A. Voth, P. Salvador, J. J. Dannenberg, V. G. Zakrzewski, S. Dapprich, A. D. Daniels, M. C. Strain, O. Farkas, D. K. Malick, A. D. Rabuck, K. Raghavachari, J. B. Foresman, J. V. Ortiz, Q. Cui, A. G. Baboul, S. Clifford, J. Cioslowski, B. B. Stefanov, G. Liu, A. Liashenko, P. Piskorz, I. Komaromi, R. L. Martin, D. J. Fox, T. Keith, M. A. Al-Laham, C. Y. Peng, A. Nanayakkara, M. Challacombe, P. M. W. Gill, B. Johnson, W. Chen, M. W. Wong, C. Gonzalez, and J. A. Pople, Gaussian, Inc., Wallingford CT, 2004.

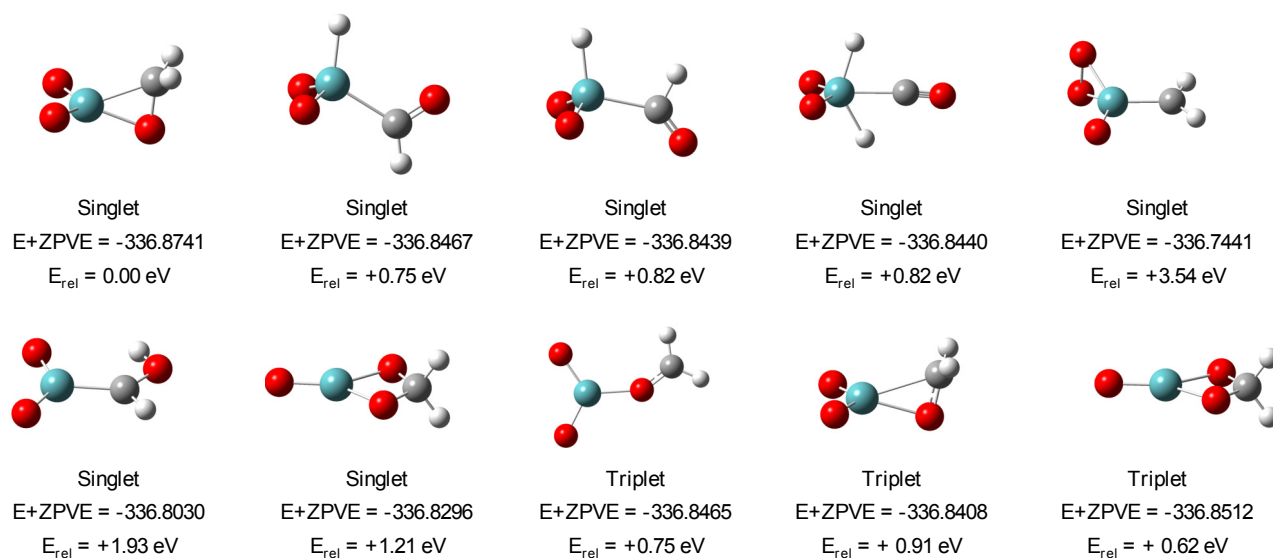

**S2:** Structures and relative energies for different structural isomers of  $[V, O_3, CH_2]^-$
